# Supplementary material for: Suhuang Antitussive Capsule Ameliorates Corticosteroid Insensitivity in Cough Variant Asthma Guinea Pigs by Inhibiting p38 MAPK Signal Pathway
Source: Evid Based Complement Alternat Med. 2022 Mar 17;2022:1699429. doi: 10.1155/2022/1699429 (PMC8947934; doi:10.1155/2022/1699429)

Table 1 Cough symptoms of guinea pigs in six groups

| **Groups** | **Cough number in 10 minutes（freq）** | **Cough latency（s）** |
| --- | --- | --- |
| **Control group** | **1.00±0.27** | **544.00(110.00)** |
| **OVA model group** | **4.25±0.59**** | **375.50(275.30)** |
| **OVA+CS model group** | **6.75±0.53***** | **184.00(147.50)***** |
| **Suhuang treatment group** | **3.88±0.55*^** | **379.50(78.70)** |
| **BUD treatment group** | **4.00±0.78**^** | **257.50(220.50)^** |
| **Combination treatment group** | **1.50±0.38∆∆∆** | **595.00(188.50)∆∆∆** |

Note. Compared with control group, *P<0.05, **P<0.01，***P<0.001. Compared with OVA+CS model group, ∆P<0.05, ∆∆P<0.01，∆∆∆P<0.001. Compared with combination treatment group, ^P<0.05, ^^P<0.01，^^^P<0.001

Table 2 RI of guinea pigs in six groups

| **Groups** | **NS** | **0.2mg/mL** | **0.4mg/mL** | **0.6mg/mL** | **0.8mg/mL** |
| --- | --- | --- | --- | --- | --- |
| **Control group** | **0.38±0.03** | **0.39±0.03** | **0.39±0.03** | **0.41±0.02** | **0.46±0.02** |
| **OVA model group** | **0.37±0.03** | **0.47±0.03** | **0.76±0.13**** | **1.35±0.21***** | **2.21±0.10***** |
| **OVA+CS model group** | **0.35±0.03** | **0.38±0.03** | **0.44±0.03** | **1.02±0.22*** | **1.85±0.21***** |
| **Suhuang treatment group** | **0.44±0.03** | **0.48±0.04** | **0.52±0.04** | **0.68±0.05** | **1.22±0.15∆^** |
| **BUD treatment group** | **0.40±0.04** | **0.57±0.08** | **0.57±0.08** | **0.78±0.10** | **1.25±0.13∆^** |
| **Combination treatment group** | **0.47±0.04** | **0.53±0.04** | **0.63±0.03** | **0.70±0.06** | **0.79±0.06∆∆∆** |

Note. Compared with control group, *P<0.05, **P<0.01，***P<0.001. Compared with OVA+CS model group, ∆P<0.05, ∆∆P<0.01，∆∆∆P<0.001. Compared with combination treatment group, ^P<0.05, ^^P<0.01，^^^P<0.001

Table 3 Cydn of guinea pigs in six groups

| **Groups** | **Cydn** |
| --- | --- |
| **Control group** | **0.53±0.05** |
| **OVA model group** | **0.32±0.02***** |
| **OVA+CS model group** | **0.29±0.01***** |
| **Suhuang treatment group** | **0.41±0.03^** |
| **BUD treatment group** | **0.39±0.02^** |
| **Combination treatment group** | **0.50±0.03∆∆** |

Note. Compared with control group, *P<0.05, **P<0.01，***P<0.001. Compared with OVA+CS model group, ∆P<0.05, ∆∆P<0.01，∆∆∆P<0.001. Compared with combination treatment group, ^P<0.05, ^^P<0.01，^^^P<0.001

Table 4 Inflammatory cytokines of guinea pigs in six groups

| **Groups** | **IL-8** | **TNF-α** |
| --- | --- | --- |
| **Control group** | **0.25±0.02** | **0.20±0.01** |
| **OVA model group** | **0.46±0.02***** | **0.34±0.02***** |
| **OVA+CS model group** | **0.47±0.04***** | **0.41±0.04***** |
| **Suhuang treatment group** | **0.39±0.01∆^^^** | **0.28±0.01∆∆^^** |
| **BUD treatment group** | **0.37±0.01∆∆^^^** | **0.26±0.02∆∆∆^** |
| **Combination treatment group** | **0.30±0.00∆∆∆** | **0.20±0.01∆∆∆** |

Note. Compared with control group, *P<0.05, **P<0.01，***P<0.001. Compared with OVA+CS model group, ∆P<0.05, ∆∆P<0.01，∆∆∆P<0.001. Compared with combination treatment group, ^P<0.05, ^^P<0.01，^^^P<0.001

Table 5 Ashcroft Score of guinea pigs in six groups

| **Groups** | **Ashcroft Score** |
| --- | --- |
| **Control group** | **1.86±0.30** |
| **OVA model group** | **6.38±0.32***** |
| **OVA+CS model group** | **6.13±0.30***** |
| **Suhuang treatment group** | **5.00±0.27^** |
| **BUD treatment group** | **5.00±0.27^** |
| **Combination treatment group** | **4.00±0.27∆∆∆** |

Note. Compared with control group, *P<0.05, **P<0.01，***P<0.001. Compared with OVA+CS model group, ∆P<0.05, ∆∆P<0.01，∆∆∆P<0.001. Compared with combination treatment group, ^P<0.05, ^^P<0.01，^^^P<0.001

Table 6 Proteins GR,total p38MAPK,p-p38MAPK of guinea pigs in six groups

| **Groups** | **GR** | **total p38MAPK** | **p-p38MAPK** |
| --- | --- | --- | --- |
| **Control group** | **1.77±0.22** | **1.02±0.08** | **1.06±0.06** |
| **OVA model group** | **2.27±0.30** | **1.58±0.14** | **1.47±0.20** |
| **OVA+CS model group** | **0.68±0.07**** | **1.78±0.17*** | **1.67±0.12*** |
| **Suhuang treatment group** | **1.52±0.18∆** | **0.79±0.05∆∆** | **0.81±0.10∆∆∆** |
| **BUD treatment group** | **0.85±0.13^^** | **1.66±0.30^^** | **1.32±0.14^^** |
| **Combination treatment group** | **1.53±0.13∆** | **0.80±0.09∆∆** | **0.75±0.13∆∆∆** |

Note. Compared with control group, *P<0.05, **P<0.01，***P<0.001. Compared with OVA+CS model group, ∆P<0.05, ∆∆P<0.01，∆∆∆P<0.001. Compared with combination treatment group, ^P<0.05, ^^P<0.01，^^^P<0.001

Table 7 mRNA MKP-1 level of guinea pigs in six groups

| **Groups** | **MKP-1** |
| --- | --- |
| **Control group** | **2.30±0.28** |
| **OVA model group** | **1.18±0.12**** |
| **OVA+CS model group** | **1.10±0.17**** |
| **Suhuang treatment group** | **2.00±0.24∆** |
| **BUD treatment group** | **1.01±0.07^^** |
| **Combination treatment group** | **2.10±0.30∆∆** |

Note. Compared with control group, *P<0.05, **P<0.01，***P<0.001. Compared with OVA+CS model group, ∆P<0.05, ∆∆P<0.01，∆∆∆P<0.001. Compared with combination treatment group, ^P<0.05, ^^P<0.01，^^^P<0.001

Figure1 levels of GR proteins in lung tissues


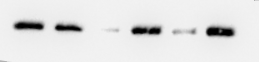

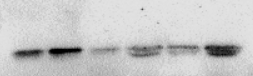

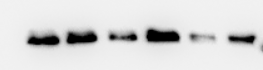


Figure2 levels of total p38MAPK proteins in lung tissues


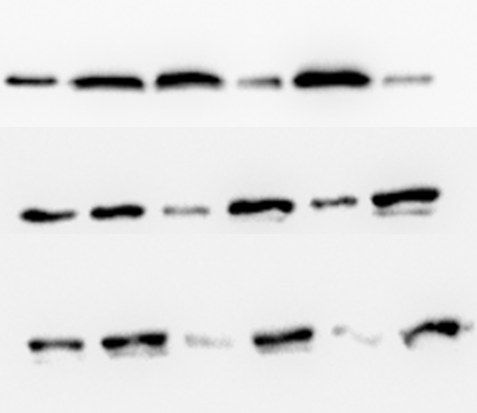


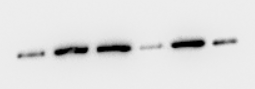
Figure3 levels of p-p38MAPK proteins in lung tissues


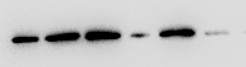

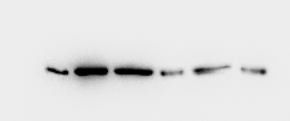
Figure 4 Aggregation of inflammatory cells(red circle) in ova group and ova+cs group HE staining slices from lung sections


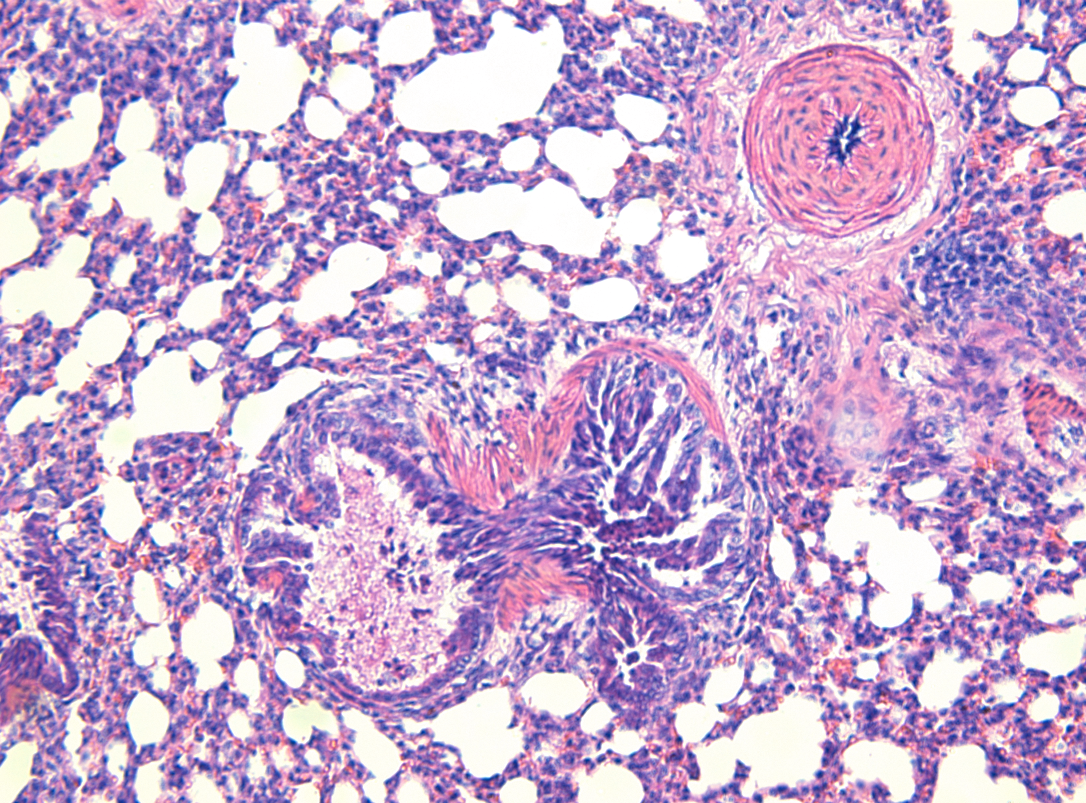


B


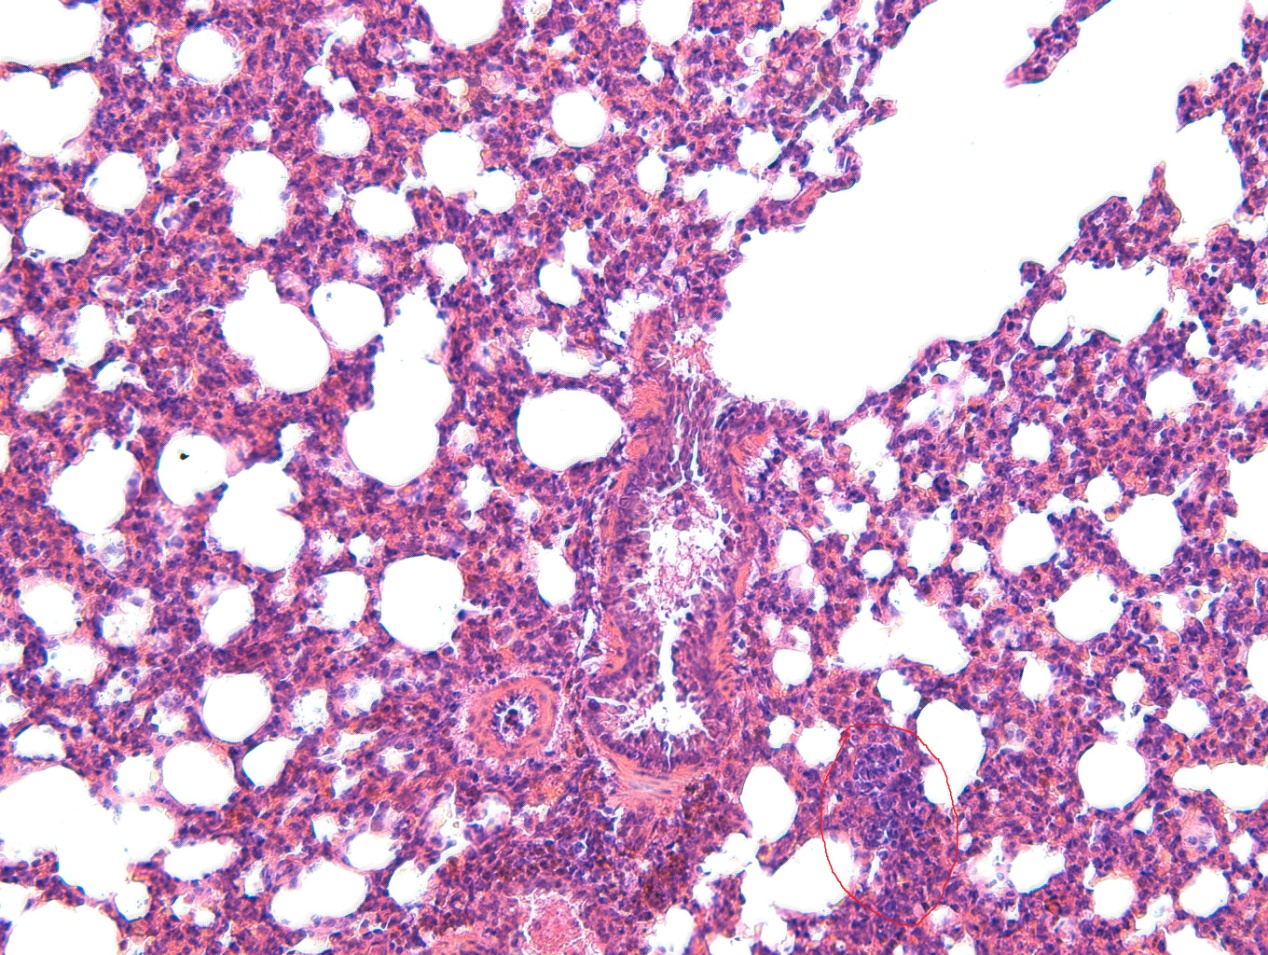

Supplement: Supplementary Materials — Supplementary Table S1: three-line table for cough symptoms of guinea pigs in six groups. Supplementary Table S2: three-line table for RI of guinea pigs in six groups. Supplementary Table S3: three-line table for Cydn of guinea pigs in six groups. Supplementary Table S4: three-line table for inflammatory cytokines of guinea pigs in six groups. Supplementary Table S5: three-line table for Ashcroft score of guinea pigs in six groups. Supplementary Table S6: three-line table for GR, total p38 MAPK, and p-p38 MAPK levels of guinea pigs in six groups. Supplementary Table S7: three-line table for mRNA MKP-1 level of guinea pigs in six groups. Supplementary Figure S1: levels of GR proteins in lung tissues. Supplementary Figure S2: levels of total p38 MAPK proteins in lung tissues. Supplementary Figure S3: levels of p-p38 MAPK proteins in lung tissues. Supplementary Figure S4: aggregation of inflammatory cells (red circle) in H&E staining slices from lung sections: (a) OVA group; (b) OVA + CS group. [file 1699429.f1.docx]
